# Supplementary material
Source: publisher site journal article supplement (https://neobiota.pensoft.net/article/36299/download/suppl/31/)
Supplement: Supplementary file 1

## Datta, Schweiger, Kühn 2020: Origin of climatic data can determine the transferability of species distribution models, NeoBiota

### Supplementary material S1: Variable selection using cluster analysis based on Spearman's rank correlation and UPGMA method for agglomeration

All 19 bioclimatic variables and their quadratic terms were used in the cluster analysis. A threshold value of  $\rho=0.7$  (or  $\rho^2=0.49$ ) was used to prune the dendrogram and select relatively less correlated variables for the purpose of modelling. One variable was selected from a cluster. Selection of a variable within the cluster was primarily based on its ecological relevance to the study species.

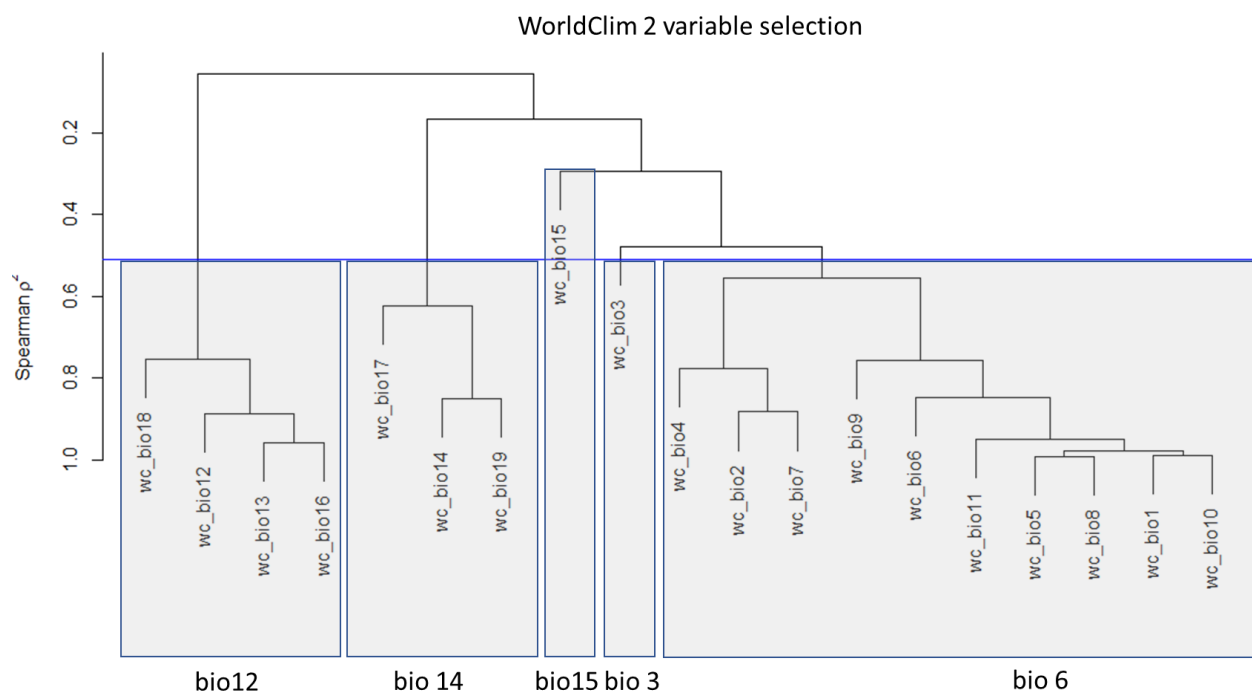

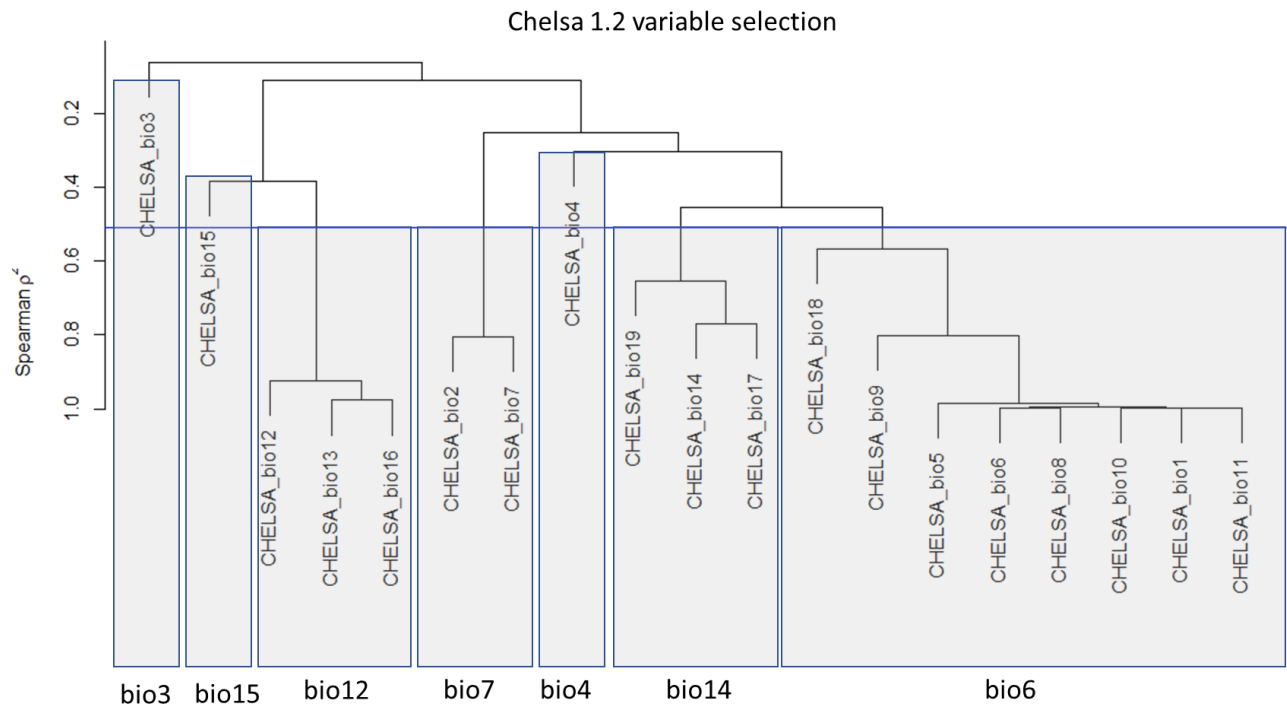

#### List of bioclimatic variables:

bio1 = Annual Mean Temperature;  
 bio2 = Mean Diurnal Range (Mean of monthly (max temp - min temp));  
 bio3 = Isothermality (BIO2/BIO7) (\* 100);  
 bio4 = Temperature Seasonality (standard deviation \*100);  
 bio5 = Max Temperature of Warmest Month;  
 bio6 = Min Temperature of Coldest Month  
 bio7 = Temperature Annual Range (BIO5-BIO6);  
 bio8 = Mean Temperature of Wettest Quarter  
 bio9 = Mean Temperature of Driest Quarter;  
 bio10 = Mean Temperature of Warmest Quarter  
 bio11 = Mean Temperature of Coldest Quarter;  
 bio12 = Annual Precipitation  
 bio13 = Precipitation of Wettest Month;  
 bio14 = Precipitation of Driest Month  
 bio15 = Precipitation Seasonality (Coefficient of Variation);  
 bio16 = Precipitation of Wettest Quarter  
 bio17 = Precipitation of Driest Quarter;  
 bio18 = Precipitation of Warmest Quarter;  
 bio19 = Precipitation of Coldest Quarter
